# Supplementary material for: Promotion of E-Cigarettes on TikTok and Regulatory Considerations
Source: Int J Environ Res Public Health. 2023 May 9;20(10):5761. doi: 10.3390/ijerph20105761 (PMC10217796; doi:10.3390/ijerph20105761)
Supplement: Supplementary file 1 [file ijerph-20-05761-s001.zip › ijerph-2289856-supplementary.pdf]

## Promotion of e-cigarettes on TikTok and regulatory considerations

Supplementary Table S1. Codebook used to categorise sampled posts

| <u><b>CODES AND DEFINITIONS</b></u>                            | <u><b>CODING RULE</b></u>                                                                                                                       |
|----------------------------------------------------------------|-------------------------------------------------------------------------------------------------------------------------------------------------|
| <i>VIDEO METRICS</i>                                           |                                                                                                                                                 |
| <b>Likes</b>                                                   |                                                                                                                                                 |
| <b>Views</b>                                                   |                                                                                                                                                 |
| <b>Comments</b>                                                |                                                                                                                                                 |
| <b>Shares</b>                                                  |                                                                                                                                                 |
| <b>Followers</b>                                               |                                                                                                                                                 |
| <b>Following</b>                                               |                                                                                                                                                 |
| <i>PRODUCTS</i>                                                |                                                                                                                                                 |
| <b>E-cigarette or vape device visible</b><br>1 = yes<br>2 = no | Are there any e-cigarette or other vape products visible in the post?                                                                           |
| <b>E-liquids or e-juice visible</b><br>1 = yes<br>2 = no       | Are there any e-juice or e-liquid products visible in the post?                                                                                 |
| <b>E-liquid flavour visible</b><br>1 = yes<br>2 = no           | Does the post indicate a flavour of e-liquid in the post?                                                                                       |
| <b>Overt product placement</b><br>1 = yes<br>2 = no            | How is the vape/tobacco product positioned in the post?<br>Overt (i.e. shown openly, or plainly apparent, and is the main focus of the post)    |
| <b>Covert product placement</b><br>1 = yes<br>2 = no           | How is the vape/tobacco product placed in the image?<br>Covert (i.e. not openly displayed, or hidden, and is not the main focus of the image)   |
| <b>Brand or logo visible</b><br>1 = yes<br>2 = no              | Is a brand or logo visible or mentioned in the post?<br>(includes in the background and on clothing, equipment, and merchandise)                |
| <i>SENTIMENT</i>                                               |                                                                                                                                                 |
| <b>Sentiment</b><br>1 = positive<br>2 = negative<br>3 = N/A    | Positive – in favour of e-cigarettes and vaping related products and use<br>Negative – against e-cigarettes and vaping related products and use |
| <b>Pro-vaping for vaping/e-cigarette</b><br>1 = yes<br>2 = no  | Is the post pro-vaping?                                                                                                                         |
| <b>Anti-vaping/e-cigarette</b><br>1 = yes<br>2 = no            | Is the post anti-vaping?                                                                                                                        |

|                                                                 |                                                                                                                                                                                                                                                |
|-----------------------------------------------------------------|------------------------------------------------------------------------------------------------------------------------------------------------------------------------------------------------------------------------------------------------|
| <b>Violates content policy</b><br>1 = yes<br>2 = no             | Does the post/video violate TikTok content policy for e-cigarettes? * See community guidelines (tiktok.com)                                                                                                                                    |
| <i>TYPE</i>                                                     |                                                                                                                                                                                                                                                |
| <b>Product review</b><br>1 = yes<br>2 = no                      | Is the post alerting viewers to a product through a review?                                                                                                                                                                                    |
| <b>Promoting vape product for purchase</b><br>1 = yes<br>2 = no | Is the post promoting a vape product for purchase?                                                                                                                                                                                             |
| <b>Monetary promotional offer</b><br>1 = yes<br>2 = no          | Is the post providing monetary offers?<br>Monetary (any promotional deal that saves you money, lowers the cost of a purchase or changes the cost of the purchase, e.g. coupons, refunds, rebates, two for one deals, and cents-off promotions) |
| <b>Non-monetary promotional offer</b><br>1 = yes<br>2 = no      | Is the post providing non-monetary offers?<br>Non-monetary (any promotional deal that does not lower the cost of a purchase, e.g. contests, giveaways, sweepstakes, free shipping or free gift with purchase)                                  |
| <b>Sponsored advertisement</b><br>1 = yes<br>2 = no             | Does post contain the terms #sponsorship or #ad?<br>On TikTok, you must enable the Branded Content toggle when posting branded content. When enabled, it adds a disclosure (e.g. #ad) to the description of your post                          |
| <b>Business affiliation</b><br>1 = yes<br>2 = no                | Does the post refer or link to a vaping related retailer/distributor? (outlets and companies that sell or distribute e-cigarettes, online or physical store)                                                                                   |
| <i>CONTENT</i>                                                  |                                                                                                                                                                                                                                                |
| <i>WARNINGS</i>                                                 |                                                                                                                                                                                                                                                |
| <b>Nicotine warning visible</b><br>1 = yes<br>2 = no            | Does the post display or refer to a nicotine warning?                                                                                                                                                                                          |
| <b>Addiction</b><br>1 = yes<br>2 = no                           | Does the post reference nicotine or vape addiction?                                                                                                                                                                                            |
| <b>Health warning visible</b><br>1 = yes<br>2 = no              | Does the post display or refer to a health warning?                                                                                                                                                                                            |
| <i>HEALTH-RELATED CONTENT</i>                                   |                                                                                                                                                                                                                                                |
| <b>Positive health effects</b><br>1 = yes<br>2 = no             | Does the post reference general positive health effects of vaping?                                                                                                                                                                             |
| <b>Negative health effects</b><br>1 = yes<br>2 = no             | Does the post reference general negative health effects of vaping?                                                                                                                                                                             |

|                                                                  |                                                                                                                                                                                                                      |
|------------------------------------------------------------------|----------------------------------------------------------------------------------------------------------------------------------------------------------------------------------------------------------------------|
| <b>Quit smoking</b><br>1 = yes<br>2 = no                         | Does the post promote vaping as a means to quit smoking? (include quit and cessation hashtags)                                                                                                                       |
| <b>Healthier than smoking</b><br>1 = yes<br>2 = no               | Does the post specifically compare vaping to smoking, stating vaping is the healthier alternative/option?                                                                                                            |
| <b>Public health</b><br>1 = yes<br>2 = no                        | Does the post reference public health professionals, organisations or journals?                                                                                                                                      |
| <b>Regulation or policy</b><br>1 = yes<br>2 = no                 | Does the post comment on e-cigarette regulation/policy?                                                                                                                                                              |
| <i>E-CIGARETTE USE CONTENT</i>                                   |                                                                                                                                                                                                                      |
| <b>Safety</b><br>1 = yes<br>2 = no                               | Does the post reference how to use e-cigarettes or handle nicotine, battery, or e-liquid 'safely'?                                                                                                                   |
| <b>Customisation</b><br>1 = yes<br>2 = no                        | Does the post depict or reference modifying or 'building' vape products/accessories or making or mixing juices?                                                                                                      |
| <b>Malfunction</b><br>1 = yes<br>2 = no                          | Does the post reference e-cigarette devices malfunctioning?                                                                                                                                                          |
| <b>Vape tricks</b><br>1 = yes<br>2 = no                          | Does the post depict or reference vape tricks, or demonstrate how to do tricks?                                                                                                                                      |
| <i>VIDEO FEATURES AND CHARACTERISTICS</i>                        |                                                                                                                                                                                                                      |
| <b>Identity or community</b><br>1 = yes<br>2 = no                | Does the post convey a vaping social identity or shared community affiliation? (determined by these hashtags in post #vapelite, #vapelyfe, #vapecommunity, #vapeworld, #vapeporn, #ecigmafia, #vapefam, #vapefamily) |
| <b>Animation</b><br>1 = yes<br>2 = no                            | Does the post contain animations or cartoons?                                                                                                                                                                        |
| <b>Humour</b><br>1 = yes<br>2 = no                               | Does the post attempt to provoke laughter and provide amusement?                                                                                                                                                     |
| <b>Music</b><br>1 = yes<br>2 = no                                | Does the post contain background or theme music?                                                                                                                                                                     |
| <b>Video length</b><br>1 = 1.5 min and under<br>2 = Over 1.5 min | How long is the length of the post?                                                                                                                                                                                  |
